# Supplementary material
Source: Springer Nature journal article supplement (https://www.springermedizin.de/resource/supplementary/12958_2005_303_MOESM2_ESM.pdf/9567582)

**A**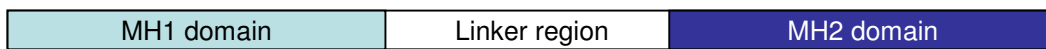**B**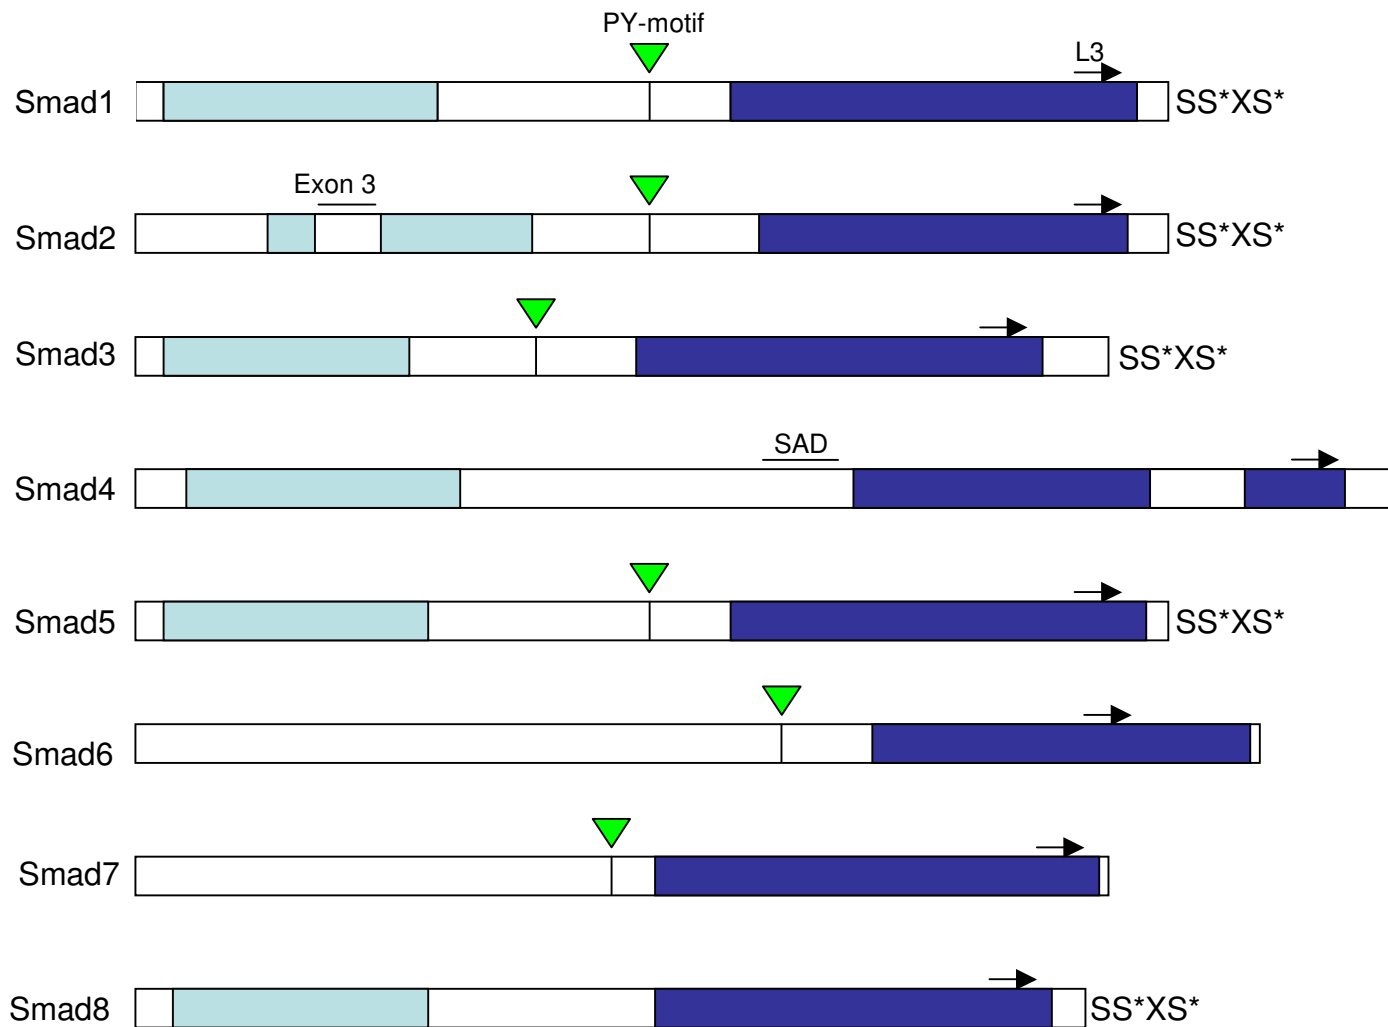

Supplement: MOESM2 [file 9567582]
